# Supplementary material
Source: Springer Nature journal article supplement (https://www.springermedizin.de/resource/supplementary/12931_2013_1476_MOESM2_ESM.pdf/9426288)

MSCs

Placebo

Kidney

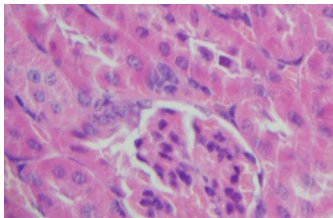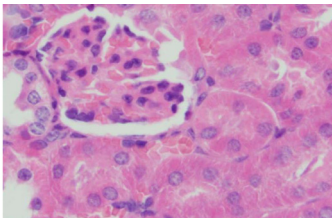

Liver

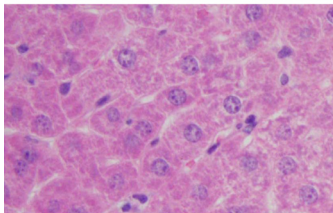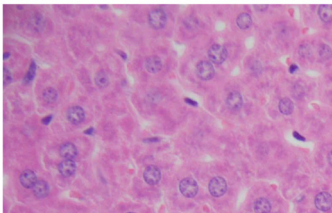

Lung

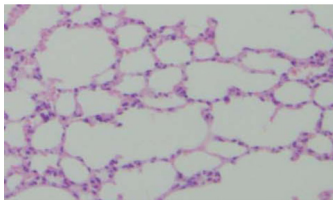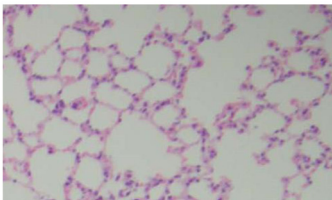

Supplement: MOESM2 [file 9426288]
